# Supplementary material for: Novel Metallo-β-Lactamase blaCVI-1 Isolated from a Chromobaterium violaceum Clinical Strain Resistant to Colistin
Source: MDPI journal article supplement (doi:10.3390/pathogens12070961), 2023-07-21
Supplement: s1 [file s1]

Phenotypic characterization of *Chromobacterium violaceum* M23796

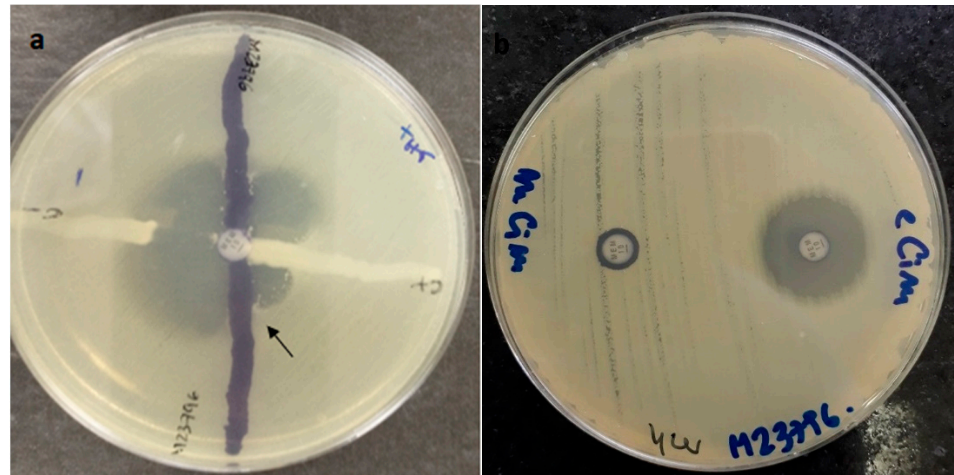

**Figure S1.** (a) Triton Hodge Test of *C. violaceum* M23796 with Meropenem. Black arrow points to outgrowth at the intersection of *C. violaceum* and the indicator strain indicating the expression of a carbapenemase. White streak to the left is the negative control (C-) and the white streak to the right is the positive control (C+). (b) mCIM and eCIM of *C. violaceum* M23796. Disc at the left: Carbapenemase positive with zone diameter of 6mm. The purple border is *C. violaceum* excess growth. Disc at the right: Metallo-β-lactamase positive eCIM with ≥ 5mm increase in diameter zone vs zone diameter for mCIM.
