# Supplementary material for: Novel Metallo-β-Lactamase blaCVI-1 Isolated from a Chromobaterium violaceum Clinical Strain Resistant to Colistin
Source: Pathogens. 2023 Jul 21;12(7):961. doi: 10.3390/pathogens12070961 (PMC10385785; doi:10.3390/pathogens12070961)
Supplement: Supplementary file 1 [file pathogens-12-00961-s001.zip]

Archive with 7 entries (7 files):
- pathogens-2476972-supplementary for XML final.pdf
- Table S1 Primer pairs used.xlsx
- Table S2 Metadata phylogenetic tree CVI.xlsx
- Table S2.xlsx
- Table S3 MBL phylogeny.xlsx
- Table S4 Unicycler assembly outcome.xlsx
- Table S5 AMR and virulence genes.xlsx
