# Supplementary material for: Novel Metallo-β-Lactamase blaCVI-1 Isolated from a Chromobaterium violaceum Clinical Strain Resistant to Colistin
Source: Pathogens. 2023 Jul 21;12(7):961. doi: 10.3390/pathogens12070961 (PMC10385785; doi:10.3390/pathogens12070961)
Supplement: Supplementary file 1 [file pathogens-12-00961-s001.zip › Table S1 Primer pairs used.xlsx]

## Sheet: Hoja1
Table S1. Primer pairs used to detect prevalent β-lactamases and mcr
Gene	Primer name	Primer sequence	Reference
blaPER	PER-U-Fw	GTGTGGGAGCCTGACGATCT	NRLAR
	PER-U-Rv	CTSTGGTCCTGTGGTGGTTTC
blaCTX-M	CTX-MU1	ATGTGCAGYACCAGTAARGT	J Clin Microbiol 2003 Sep;41(9):4264-9.
	CTX-MU2	TGGGTRAARTARGTSACCAGA
blaKPC	KPC-F	AACAAGGAATATCGTTGATG	NRLAR
	KPC-R	AGATGATTTTCAGAGCCTTA
blaLAT-1/4;CMY-2/7,BIL-1	CITMF	TGGCCAGAACTGACAGGCAAA	J Clin Microbiol 2002 Jun; 40(6): 2153-62.
	CITMR	TTTCTCCTGAACGTGGCTGGC
blaVIM	VIM-F	AgTggTgAgTATCCgACAg	Antimicrob Agents Chemother. 2003 Jan;47(1):395-7
	VIM-R	ATgAAAgTgCgTggAgAC
blaIMP	IMP-UF1	GGYGTTTWTGTTCATACWTCKTTYGA	NRLAR
	IMP-UR1	GGYARCCAAACCACTASGTTATCT
blaNDM	NDM-F	AGCACACTTCCTATCTCGAC	NRLAR
	NDM-R	GGCGTAGTGCTCAGTGTC
mcr-1	CLR5-F	CGGTCAGTCCGTTTGTTC	Lancet Infect Dis 2016 Feb;16(2):161-8.
	CLR5-R	CTTGGTCGGTCTGTAGGG
NRLAR, National Reference Laboratory in Antimicrobial Resistance
