# Supplementary material for: Novel Metallo-β-Lactamase blaCVI-1 Isolated from a Chromobaterium violaceum Clinical Strain Resistant to Colistin
Source: Pathogens. 2023 Jul 21;12(7):961. doi: 10.3390/pathogens12070961 (PMC10385785; doi:10.3390/pathogens12070961)
Supplement: Supplementary file 1 [file pathogens-12-00961-s001.zip › Table S2 Metadata phylogenetic tree CVI.xlsx]

## Sheet: genomas PATRIC_genome
Table S2. Metadata of dataset used to build the phylogenetic tree of Chromobacterium violaceum
Genome ID	Genome Name	Assembly Accession	NCBI Taxon ID	Genome Status	Strain	Completion Date	Publication	BioProject Accession	BioSample Accession	Assembly Accession	GenBank Accessions	RefSeq Accessions	Sequencing Centers	Sequencing Status	Sequencing Platform	Sequencing Depth	Assembly Method	Chromosomes	Plasmids	Contigs	Genome Length	GC Content	PATRIC CDS	RefSeq CDS	Isolation Source	Isolation Comments	Collection Date	Isolation Country	Geographic Location	Host Name	Comments	Additional Metadata	Coarse Consistency	Fine Consistency	Checkm Completeness	Checkm Contamination	Genome Quality Flags	Genome Quality	Date Inserted	Date Modified
243365.4	Chromobacterium violaceum ATCC 12472	GCA_000007705.1	243365	Complete	ATCC 12472	2003-09-23T00:00:00Z	14500782	PRJNA444	SAMN02603528	GCA_000007705.1	AE016825	NC_005085	LNCC - Laboratorio Nacional de Computacao Cientifica	complete				1		1	4751080	64.8	4327	4407	freshwater	isolated from freshwater in Malaya	nd	Malaya	Malaya		Chromobacterium violaceum ATCC 12472. Chromobacterium violaceum ATCC 12472 was isolated from freshwater in Malaya. This organism has a violacein operon for pigment production which is under quorum-sensing control, as are a number of important metabolic functions. This organism also has a chromosomally-encoded type III secretion system that is similar to systems from Salmonella and Yersinia, and m…		99.8	99.5	99.2	6.9		Good	2014-12-08T22:10:55.273Z	2015-03-16T03:17:09.594Z
536.43	Chromobacterium violaceum strain CV1192	GCA_002735945.1	536	Complete	CV1192	2017-11-07T00:00:00Z		PRJNA413993	SAMN07775572	GCA_002735945.1	CP024028		Instituto de Ciencias Biomedicas - Universidade de Sao Paulo		Illumina HiSeq	43.0x	SPAdes v. 3.7	1		1	4386139	65.61	4172	3980	Rio Negro river	isolated from Rio Negro, Manaus - Brazil	2014-10-20	Brazil	Brazil: Manaus	Human, Homo sapiens	This Chromobacterium violaceum strain was isolated from Rio Negro, Manaus - Brazil. It is a totally different ecosystem from where the ATCC 12472 strain was isolated. Comparing several genomes is important to understand how the evolution of this bacteria occurred.	sample_type:Bacteria culture	99.7	99.3	99.2	6.9		Good	2017-11-24T17:02:58.136Z	2017-11-24T17:02:58.136Z
536.44	Chromobacterium violaceum strain CV1197	GCA_002735965.1	536	Complete	CV1197	2017-11-07T00:00:00Z		PRJNA413993	SAMN07788183	GCA_002735965.1	CP024029		Instituto de Ciencias Biomedicas - Universidade de Sao Paulo		Illumina HiSeq	90.0x	SPAdes v. 3.7	1		1	4388579	65.61	4170	3982	Rio Negro river	isolated from Rio Negro, Manaus - Brazil	2014-10-20	Brazil	Brazil: Manaus	Human, Homo sapiens	This Chromobacterium violaceum strain was isolated from Rio Negro, Manaus - Brazil. It is a totally different ecosystem from where the ATCC 12472 strain was isolated. Comparing several genomes is important to understand how the evolution of this bacteria occurred.	sample_type:Bacteria culture	99.7	99.2	99.2	6.9		Good	2017-11-24T17:03:04.326Z	2017-11-24T17:03:04.326Z
536.61	Chromobacterium violaceum strain FDAARGOS_635 strain Not applicable	GCA_012273555.1	536	Complete	Not applicable	2020-04-12T00:00:00Z		PRJNA231221	SAMN11056350	GCA_012273555.1	CP050992,CP050991		US Food and Drug Administration		Pacbio; Illumina	753.81x	canu v. 1.4	1	1	2	4800763	6504681	4615	4407	clinical isolate		nd	USA	USA: KY	Human, Homo sapiens	In May 2014, the FDA and collaborators established a publicly available dAtabase for Reference Grade micrObial Sequences called FDA-ARGOS. With funding support from FDAâ€™s Office of Counterterrorism and Emerging Threats (OCET) and DoD, the FDA-ARGOS team are initially collecting and sequencing 2000 microbes that include biothreat microorganisms, common clinical pathogens and closely related spec…	collected_by:University of Louisville	97.3	96.6				Good	2020-04-26T14:36:19.314Z	2020-04-26T14:36:19.314Z
536.5	Chromobacterium violaceum GN5	GCA_000812485.1	536	WGS	GN5	2014-12-31T00:00:00Z	-	PRJNA269999	SAMN03261527	GCA_000812485.1	JWPW00000000	-	University of Malaya		Illumina HiSeq	40.0x	CLC NGS Cell v. 2012-12-09			89	4870669	64.65	4576		animal farm	Isolated from animal farm	2014-09-15	Malaysia	Malaysia: Selangor		Isolated from animal farm. Water		99.3	98.7	99.2	7.6		Good	2015-03-12T13:56:40.232Z	2015-03-16T03:17:09.594Z
536.26	Chromobacterium violaceum strain 16-419A	GCA_002081735.1	536	WGS	16-419A	2017-04-06T00:00:00Z		PRJNA369804	SAMN06294332	GCA_002081735.1	MUKQ00000000									51	4760708	64.99	4664	4331	trachea		05-Aug-2010	United States	USA: Louisiana	Human, Homo sapiens			99.8	98.1	99.2	6.2		Good	2017-05-28T09:38:43.224Z	2017-05-28T09:38:43.224Z
536.27	Chromobacterium violaceum strain 16-419B	GCA_002081745.1	536	WGS	16-419B	2017-04-06T00:00:00Z		PRJNA369804	SAMN06294333	GCA_002081745.1	MUKR00000000									53	4758994	64.99	4669	4329	trachea		05-Aug-2010	United States	USA: Louisiana	Human, Homo sapiens			99.8	98.1	99.2	6.2		Good	2017-05-28T09:38:00.215Z	2017-05-28T09:38:00.215Z
536.28	Chromobacterium violaceum strain 16-454	GCA_002081775.1	536	WGS	16-454	2017-04-06T00:00:00Z		PRJNA369804	SAMN06294334	GCA_002081775.1	MUKS00000000									52	4778967	64.55	4745	4350	soil		2016-10-05	United States	USA: Louisiana				99.4	98.8	99.2	9		Good	2017-05-28T09:34:43.945Z	2017-05-28T09:34:43.945Z
536.29	Chromobacterium violaceum strain H5524	GCA_002081875.1	536	WGS	H5524	2017-04-06T00:00:00Z		PRJNA369804	SAMN06294335	GCA_002081875.1	MUKW00000000									53	4725438	64.73	4701	4308	blood		2016-10-05	United States	USA: Louisiana	Human, Homo sapiens			99.8	99.3	99.2	6.9		Good	2017-05-28T09:45:33.791Z	2017-05-28T09:45:33.791Z
536.30	Chromobacterium violaceum strain H5525	GCA_002081895.1	536	WGS	H5525	2017-04-06T00:00:00Z		PRJNA369804	SAMN06294336	GCA_002081895.1	MUKX00000000									63	4723065	64.75	4690	4303	blood		2016-11-16	United States	USA: Louisiana	Human, Homo sapiens			99.8	99.3	99.2	6.9		Good	2017-05-28T09:43:20.925Z	2017-05-28T09:43:20.925Z
536.31	Chromobacterium violaceum strain GHPS1	GCA_002179535.1	536	WGS	GHPS1	2017-06-08T00:00:00Z		PRJNA387362	SAMN07150491	GCA_002179535.1	NHOO00000000		University of Neuchatel		Illumina MiSeq	100.0x	CLC NGS Cell v. 5.0.3			67	4816970	64.87	4823	4460	Hydrocarbon polluted soil	isolated and characterized at the biochemeical and genomic level and shown to display an awesome secondary metabolite arsenal and a battery of drug and heavy-metal-resistance and detoxification of xenobiotics proteins	15-Jan-2017	French Guiana	French Guiana		The study aimed to isolate bacterial actors of hydrocarbon degradation from a French Guiana hydrocarbon polluted soil. Chromobacterium violaceum was isolated and characterized at the biochemeical and genomic level and shown to display an awesome secondary metabolite arsenal and a battery of drug and heavy-metal-resistance and detoxification of xenobiotics proteins.	sample_type:whole organism	99.6	98.7	99.2	6.2		Good	2017-07-22T13:29:01.440Z	2017-07-22T13:29:01.440Z
536.53	Chromobacterium violaceum strain NCTC9757	GCA_900446805.1	536	WGS	NCTC9757	2018-08-06T00:00:00Z		PRJEB6403	SAMEA3643314	GCA_900446805.1	UFVI01000000		SC							6	4751982	6484185	4572	4282	Freshwater		1900/1952	Malaysia	Malaysia		http://www.sanger.ac.uk/resources/downloads/bacteria/nctc/		99.5	98.9	99.2	7.6		Good	2018-10-04T00:38:33.139Z	2018-10-04T00:38:33.139Z
536.55	Chromobacterium violaceum strain NCTC8684	GCA_900460965.1	536	WGS	NCTC8684	2018-08-07T00:00:00Z		PRJEB6403	SAMEA3182907	GCA_900460965.1	UIGR01000000		SC							3	4860174	64429214	4855	4544	not available: to be reported later		1937	USA	USA: Florida	Human, Homo sapiens	http://www.sanger.ac.uk/resources/downloads/bacteria/nctc/		98.7	96.2	99.2	10.3		Good	2018-10-04T08:38:22.157Z	2018-10-04T08:38:22.157Z
536.7	Chromobacterium violaceum strain L_1B5_1	GCF_000952105.1	536	WGS	L_1B5_1	2015-03-13T00:00:00Z		PRJNA275561	SAMN03349749	GCF_000952105.1	JYGI01000000		University of Malaya		Illumina HiSeq	64.18x	CLC Genomics Workbench v. 7.0.4			98	4859603	64.65	4784	3897	Man-made lake		14-Apr-2014	Malaysia	Malaysia:Selangor		To announce draft genome of Chromobacterium violaceum L_1B5_1	sample_type:Water;biomaterial_provider:Microbiome 1,2&3, High Impact Research Building, University of Malaya, Kuala Lumpur.;collected_by:Kher Heng Leong	99.6	98.9	99.2	7.6		Good	2016-01-17T15:48:42.431Z	2016-01-17T15:48:42.431Z
536.8	Chromobacterium violaceum strain LK6	GCF_001043595.1	536	WGS	LK6	2015-06-30T00:00:00Z		PRJNA277398	SAMN03390111	GCF_001043595.1	LDUM01000000		University of Malaya		Illumina MiSeq	157.0x	CLC Genomic Workbench v. 7			94	4755712	64.97	4750	4140	Plant		2010-10-06	Malaysia	Malaysia: Malacca		Biocatalytic bacteria	sample_type:monoculture	99.6	98.6	99.2	9		Good	2016-01-17T16:10:59.022Z	2016-01-17T16:10:59.022Z
536.9	Chromobacterium violaceum strain LK17	GCF_001043735.1	536	WGS	LK17	2015-06-30T00:00:00Z		PRJNA277410	SAMN03744444	GCF_001043735.1	LDUU01000000		University of Malaya		Illumina MiSeq	176.0x	CLC Genomic Workbench v. 7			76	4763883	64.95	4734	4124	Plant		2010-07-06	Malaysia	Malaysia: Malacca		Biocatalytic Bacteria	sample_type:Whole organism	99.6	98.7	99.2	9		Good	2016-01-17T16:11:01.564Z	2016-01-17T16:11:01.564Z
536.10	Chromobacterium violaceum strain LK15	GCF_001043755.1	536	WGS	LK15	2015-06-30T00:00:00Z		PRJNA277407	SAMN03744442	GCF_001043755.1	LDUT01000000		University of Malaya		Illumina MiSeq	150.0x	CLC Genomic Workbench v. 7			151	4754524	64.96	4771	4163	Plant		2010-07-06	Malaysia	Malaysia: Malacca		Biocatalytic Bacteria	sample_type:Whole organism	99.6	98.2	99.2	9		Good	2016-01-17T16:11:01.943Z	2016-01-17T16:11:01.943Z
536.11	Chromobacterium violaceum strain LK30	GCF_001043815.1	536	WGS	LK30	2015-06-30T00:00:00Z		PRJNA277426	SAMN03751790	GCF_001043815.1	LDUX01000000		University of Malaya		Illumina MiSeq	77.0x	CLC Genomic Workbench v. 7			87	4752491	64.95	4716	4123	Plant		2010-07-06	Malaysia	Malaysia: Malacca		Biocatalytic bacteria	sample_type:Whole organism	99.5	98.7	99.2	11		Good	2016-01-17T16:11:03.070Z	2016-01-17T16:11:03.070Z
536.65	Chromobacterium violaceum strain RDN09	GCA_014117535	536	WGS	RDN09	2020-08-09T00:00:00Z		PRJNA640761	SAMN15332061		JABXOB010000010,JABXOB010000011,JABXOB010000012,JABXOB010000013,JABXOB010000014,JABXOB010000015,JABXOB010000016		International Centre for Diarrhoeal Disease Research Bangladesh, Dhaka, Bangladesh		Illumina NextSeq	132.94x	SPAdes v. 3.11.1			73	4736739	6488985	4697	4417	Pus sample	isolated from the infected wound of an adult male patient in Bangladesh	2017-10-21	Bangladesh	Bangladesh	Homo sapiens	Chromobacterium violaceum is an emerging environmental pathogen that causes life-threatening infections in humans and animals. We describe the draft genome sequence of Chromobacterium violaceum RDN09, isolated from the infected wound of an adult male patient in Bangladesh.	sample_type:Bacterial culture;identified_by:Razib Mazumder	97.5	97				Good	2020-08-22T10:19:28.608Z	2020-08-22T10:19:28.608Z
536.59	Chromobacterium violaceum uni_cvi23796		536	WGS	M23796												PATRIC 3.6.7 Unicycler			60	4701626	6503393	4643		Blood	Sepsis caused by an infected wound caused by a spine in a lagoon in Chaco province, Argentina	ene-2019	Argentina	Chaco: Argentina	Homo sapiens			97.3	96.5				Good	2020-01-06T19:24:56.887Z	2020-01-06T19:24:56.887Z
