# Supplementary material for: Novel Metallo-β-Lactamase blaCVI-1 Isolated from a Chromobaterium violaceum Clinical Strain Resistant to Colistin
Source: Pathogens. 2023 Jul 21;12(7):961. doi: 10.3390/pathogens12070961 (PMC10385785; doi:10.3390/pathogens12070961)
Supplement: Supplementary file 1 [file pathogens-12-00961-s001.zip › Table S2.xlsx]

## Sheet: Hoja1
Table S2. Metadata of dataset used to build the phylogenetic tree of Chromobacterium violaceum
Assembly Accession	Strain	Isolation Source	Collection Date	Isolation Country	BioProject Accession	BioSample Accession	GenBank Accessions	Sequencing Status	Sequencing Platform	Sequencing Depth	Assembly Method	Contigs	Genome Quality	Size	GC Content	Contig N50	CDS	Sequencing Center	Isolation Comments	Geographic Location
Cvi_M23796	M23796	Clinical isolate: wound	2019	Argentina	PRJNA747180	SAMN20283044	JAHWXW000000000	WGS	Illumina MiSeq	70.0x	Unicycler v. Jan-2020	60	Good	4701626	65.0339	159083	4673	ANLIS "Dr. Carlos G. Malbran"	isolated in Chaco province, in the north of Argentina, from the wound of a child generated by a spine while bathing in a lagoon in 2019	Argentina: Chaco
GCA_000007705	ATCC 12472	Environment: freshwater	nd	Malaysia	PRJNA444	SAMN02603528	AE016825	Complete				1	Good	4751080	64.8	4751080	4327	LNCC - Laboratorio Nacional de Computacao Cientifica	isolated from freshwater in Malaya	Malaya
GCA_000812485	GN5	Food animal	2014-09-15	Malaysia	PRJNA269999	SAMN03261527	JWPW00000000	WGS	Illumina HiSeq	40.0x	CLC NGS Cell v. 2012-12-09	89	Good	4870669	64.65	173716	4576	University of Malaya	Isolated from farm animal	Malaysia: Selangor
GCA_000952105	L_1B5_1	Environment: Freshwater	2014-04-14	Malaysia	PRJNA275561	SAMN03349749	JYGI00000000	WGS	Illumina HiSeq	64.18x	CLC Genomics Workbench v. 7.0.4	98	Good	4859603	64.65	172708	4784	University of Malaya	Man-made lake	Malaysia:Selangor
GCA_001043595	LK6	Environment: Plant	2010-10-06	Malaysia	PRJNA277398	SAMN03390111	LDUM00000000	WGS	Illumina MiSeq	157.0x	CLC Genomic Workbench v. 7	94	Good	4755712	64.97	211887	4749	University of Malaya		Malaysia: Malacca
GCA_001043735	LK17	Environment: Plant	2010-07-06	Malaysia	PRJNA277410	SAMN03744444	LDUU00000000	WGS	Illumina MiSeq	176.0x	CLC Genomic Workbench v. 7	76	Good	4763883	64.95	195376	4733	University of Malaya		Malaysia: Malacca
GCA_001043755	LK15	Environment: Plant	2010-07-06	Malaysia	PRJNA277407	SAMN03744442	LDUT00000000	WGS	Illumina MiSeq	150.0x	CLC Genomic Workbench v. 7	151	Good	4754524	64.96	178393	4769	University of Malaya		Malaysia: Malacca
GCA_001043815	LK30	Environment: Plant	2010-07-06	Malaysia	PRJNA277426	SAMN03751790	LDUX00000000	WGS	Illumina MiSeq	77.0x	CLC Genomic Workbench v. 7	87	Poor	4752491	64.95	200908	4715	University of Malaya		Malaysia: Malacca
GCA_001953795	LMG 3953	nd	1953	nd	PRJNA353943	SAMN06030702	MQZX00000000	WGS	Illumina HiSeq	50.37x	Velvet v. OCT-2016	326	Good	4629225	64.71	44500	4724	Midwestern University
GCA_002081735	16-419A	Clinical Isolate: trachea	2010-08-05	USA	PRJNA369804	SAMN06294332	MUKQ00000000	WGS				51	Good	4760708	64.99	284564	4664		Human, Homo sapiens	USA: Louisiana
GCA_002081745	16-419B	Clinical Isolate: trachea	2010-08-05	USA	PRJNA369804	SAMN06294333	MUKR00000000	WGS				53	Good	4758994	64.99	284564	4669		Human, Homo sapiens	USA: Louisiana
GCA_002081775	16-454	Environment: soil	2016-10-05	USA	PRJNA369804	SAMN06294334	MUKS00000000	WGS				52	Good	4778967	64.55	277619	4745			USA: Louisiana
GCA_002081875	H5524	Clinical Isolate; blood	2016-10-05	USA	PRJNA369804	SAMN06294335	MUKW00000000	WGS				53	Good	4725438	64.73	186229	4701		Human, Homo sapiens	USA: Louisiana
GCA_002081895	H5525	Clinical Isolate: blood	2016-11-16	USA	PRJNA369804	SAMN06294336	MUKX00000000	WGS				63	Good	4723065	64.75	186229	4690		Human, Homo sapiens	USA: Louisiana
GCA_002179535	GHPS1	Environment	2017-01-15	French Guiana	PRJNA387362	SAMN07150491	NHOO00000000	WGS	Illumina MiSeq	100.0x	CLC NGS Cell v. 5.0.3	67	Good	4816970	64.87	204147	4823	University of Neuchatel	Hydrocarbon polluted soil. isolated and characterized at the biochemeical and genomic level and shown to display an awesome secondary metabolite arsenal and a battery of drug and heavy-metal-resistance and detoxification of xenobiotics proteins	French Guiana
GCA_002735945	CV1192	Environment: Freshwater	2014-10-20	Brazil	PRJNA413993	SAMN07775572	CP024028	Complete	Illumina HiSeq	43.0x	SPAdes v. 3.7	1	Good	4386139	65.61	4386139	4172	Instituto de Ciencias Biomedicas - Universidade de Sao Paulo	isolated from Rio Negro, Manaus - Brazil	Brazil: Manaus
GCA_002735965	CV1197	Environment: Freshwater	2014-10-20	Brazil	PRJNA413993	SAMN07788183	CP024029	Complete	Illumina HiSeq	90.0x	SPAdes v. 3.7	1	Good	4388579	65.61	4388579	4170	Instituto de Ciencias Biomedicas - Universidade de Sao Paulo	isolated from Rio Negro, Manaus - Brazil	Brazil: Manaus
GCA_012273555	Not applicable	Clinical isolate	nd	USA	PRJNA231221	SAMN11056350	CP050992,CP050991	Complete	Pacbio; Illumina	753.81x	canu v. 1.4	2	Good	4800763	65.0468	4757798	4615	US Food and Drug Administration	Human, Homo sapiens	USA: KY
GCA_014117535	RDN09	Clinical isolate: Pus	2017-10-21	Bangladesh	PRJNA640761	SAMN15332061	JABXOB000000000	WGS	Illumina NextSeq	132.94x	SPAdes v. 3.11.1	73	Good	4736739	64.8898	390861	4697	International Centre for Diarrhoeal Disease Research Bangladesh, Dhaka, Bangladesh	isolated from the infected wound of an adult male patient in Bangladesh	Bangladesh
GCA_016888985	Not applicable	nd	nd	USA	PRJNA231221	SAMN16357416	CP069442,CP069443	Complete	Pacbio; Illumina	1043.52x	SMRT v. 8.0.0, HGAP v. 4	2	Good	4808040	64.893	4758933	4687	US Food and Drug Administration		USA:MD
GCA_017939545	CGB1	Environment	2018	Singapore	PRJNA719938	SAMN18628966	JAGKRF000000000	WGS	Illumina MiSeq	200x	Velvet v. DEC-2018	130	Good	4773110	64.356	113859	4848	Nanyang Technological University		Singapore
GCA_900446805	NCTC9757	Environment: Freshwater	1900-1952	Malaysia	PRJEB6403	SAMEA3643314	UFVI00000000	WGS				6	Good	4751982	64.8418	986607	4572	SC		Malaysia
GCA_900460965	NCTC8684	nd	1937	USA	PRJEB6403	SAMEA3182907	UIGR00000000	WGS				3	Poor	4860174	64.4292	4254093	4855	SC	Human, Homo sapiens	USA: Florida
GCA_900635845	NCTC9695	Clinical isolate: blood	1953	USA	PRJEB6403	SAMEA3182908	LR134182	Complete				1	Poor	4733553	64.9076	4733553	6957	SC	Pig, Sus scrofa	USA: Georgia
GCF_016890085	Not applicable	nd	nd	USA	PRJNA231221	SAMN16357415	CP069587,CP069588	Complete	Pacbio; Illumina	700.22x	SMRT v. 8.0.0, HGAP v. 4	2	Good	4808040	64.893	4758933	4689	US Food and Drug Administration		USA:MD
GCF_017939465	CGB6	Environment	2018	Singapore	PRJNA719938	SAMN18628967	JAGKRE000000000	WGS	Illumina MiSeq	200x	Velvet v. DEC-2018	56	Good	4879965	64.4991	392572	4912	Nanyang Technological University		Singapore
GCF_018619115	WCH4	Clinical isolate: eye	2019-12-01	Malaysia	PRJNA698279	SAMN17711150	JAFBBB000000000	WGS	Illumina MiSeq	430.0x	Unicycler v. Sep-2020	37	Good	4637406	64.8937	434055	4589	Universiti Malaysia Sabah	intravitreal tap from 78 year old male patient	Malaysia: Sabah Kota Kinabalu
GCF_020282385	OUAT_2017	Wild animal: lung	2017	India	PRJNA764546	SAMN21508251	JAIUJK000000000	WGS	Illumina	60.0x	Unicycler v. 0.4.8	70	Good	4683717	64.8722	434127	4651	University of Minnesota	elephant	India
GCF_020991315	CR2	nd	2017-11-21	Brazil	PRJNA782632	SAMN23391274	JAJMMA000000000	WGS	Illumina MiSeq	200.0x	CLC GenomicsWorkBench v. 21	49	Good	4836175	64.9932	262734	4802	NCAUR-ARS-USDA		Brazil
