# Supplementary material for: Novel Metallo-β-Lactamase blaCVI-1 Isolated from a Chromobaterium violaceum Clinical Strain Resistant to Colistin
Source: Pathogens. 2023 Jul 21;12(7):961. doi: 10.3390/pathogens12070961 (PMC10385785; doi:10.3390/pathogens12070961)
Supplement: Supplementary file 1 [file pathogens-12-00961-s001.zip › Table S3 MBL phylogeny.xlsx]

## Sheet: Hoja1
Table S4. Input conditions to build the phylogenetic tree of metallo-β-lacatamases with Neighbour Joining Method in MEGA
Analysis
Scope	All selected taxa
Statistical method	Neighbor-joining
Phylogeny Test
Test of Phylogeny	Bootstrap method
No. Of Bootstrap Replications	1000
Substritution Model
Substitutions Type	Amino acid
Model/Method	Poisson model
Rates and Patterns
Rates aamong Sites	Uniform Rates
Pattern among Lineages	Same (Homogeneous)
Data Subset to use
Gaps/missing Data Treatment	Complete deletion
System Resource Usage
Number of Threads	8
Accession numbers of the sequences included in the tree
ENZYME NAME	ACCESSION NUMBER
DIM-1	GU323019.1
GIM-1	AJ620678.1
IMP-8	AF322577.2
VIM-2	AF191564.1
NDM-1	FN396876.1
SPM-1	AJ492820.1
CVI-1	MN918151.1
imiH	AJ548797.1
cphA	AY261376.1
GOB-1	AF090141.1
AIM-1	AM998375.1
L1	AB294542.1
