# Supplementary material for: Novel Metallo-β-Lactamase blaCVI-1 Isolated from a Chromobaterium violaceum Clinical Strain Resistant to Colistin
Source: Pathogens. 2023 Jul 21;12(7):961. doi: 10.3390/pathogens12070961 (PMC10385785; doi:10.3390/pathogens12070961)
Supplement: Supplementary file 1 [file pathogens-12-00961-s001.zip › Table S4 Unicycler assembly outcome.xlsx]

## Sheet: Hoja1
Table S3. Assembly details and of C. violaceum M23796
Contigs	60
CDS	4643
GC Content	65.03
Plasmids	0
ContigL50	10
GenomeLength	4,701,626 bp
ContigN50	159.083
NCBI TaxonID	536
Proteins with functional assignments	3320
Hypothetical proteins	1323
Antibiotic Resistance (NCBI/PATRIC)	48
Virulence Factor (PATRIC_VF/VFDB/VICTORS)	7
Transporter (TCDB)	7
