# Supplementary material for: Novel Metallo-β-Lactamase blaCVI-1 Isolated from a Chromobaterium violaceum Clinical Strain Resistant to Colistin
Source: Pathogens. 2023 Jul 21;12(7):961. doi: 10.3390/pathogens12070961 (PMC10385785; doi:10.3390/pathogens12070961)
Supplement: Supplementary file 1 [file pathogens-12-00961-s001.zip › Table S5 AMR and virulence genes.xlsx]

## Sheet: Hoja1
Table S5. Genes involved in antimicrobial resistance and virulence in C. violaceum M23796
Genes involved in antimicrobial resistance	Sequence name
AAC(6')-Ic,f,g,h,j,k,l,r-z	Aminoglycoside N(6')-acetyltransferase (EC 2.3.1.82) => AAC(6')-Ic,f,g,h,j,k,l,r-z
Class C beta-lactamase (EC 3.5.2.6)	antibiotic inactivation enzyme (see section 4 in the text for more detail)
blaCVI-1	Subclass B2 beta-lactamase (EC 3.5.2.6)
aacA48	aminoglycoside 6'-N-acetyltransferase AAC(6')-Iag
dfrA3	trimethoprim-resistant dihydrofolate reductase DfrA3
blaPDC	PDC family class C beta-lactamase
qacL	quaternary ammonium compound efflux SMR transporter QacL
fosA	FosA family fosfomycin resistance glutathione transferase
ArnC	Polymyxin resistance protein ArnC, glycosyl transferase (EC 2.4.-.-)
ArnT	Undecaprenyl phosphate-alpha-4-amino-4-deoxy-L-arabinose arabinosyl transferase (EC 2.4.2.43)
MacB	Macrolide export ATP-binding/permease protein MacB
MacA	Macrolide-specific efflux protein MacA
MdfA/Cmr	Multidrug efflux pump MdfA/Cmr (of MFS type), broad spectrum
EmrAB-TolC (MFS type)	Multidrug efflux system EmrAB-OMF, inner-membrane proton/drug antiporter EmrB (MFS type)
MdtABC-TolC (RND type)	Multidrug efflux system MdtABC-TolC, inner-membrane proton/drug antiporter MdtB (RND type)
MdtABC-TolC	Multidrug efflux system MdtABC-TolC, membrane fusion component MdtA
EmrAB-OMF	Outer membrane factor (OMF) lipoprotein associated wth EmrAB-OMF efflux system
MdtABC-OMF	Outer membrane factor (OMF) lipoprotein associated wth MdtABC efflux system
gidB	16S rRNA (guanine(527)-N(7))-methyltransferase (EC 2.1.1.170)
BcrC	Undecaprenyl-diphosphatase BcrC (EC 3.6.1.27), conveys bacitracin resistance
OxyR	Hydrogen peroxide-inducible genes activator => OxyR
EmrAB-TolC	Multidrug resistance regulator EmrR (MprA)
Gene name that code for Type III secretion system	Product of Type III secretion system	Contig	PATRIC ID	Nucleotide length	Amino Acid length
LcrD,HrcV,EscV,SsaV	Type III secretion inner membrane channel protein (LcrD,HrcV,EscV,SsaV)	536.59.con.0006	fig|536.59.peg.1441	2100	699
YopE	Type III secretion injected virulence protein (YopE)	536.59.con.0006	fig|536.59.peg.1455	2076	691
HilA	Type III secretion transcriptional activator HilA	536.59.con.0006	fig|536.59.peg.1430	1686	561
YscC,MxiD,HrcC, InvG	Type III secretion outermembrane pore forming protein (YscC,MxiD,HrcC, InvG)	536.59.con.0006	fig|536.59.peg.1439	1686	561
YopH	Type III secretion injected virulence protein (YopH,tyrosine phosphatase of FAK and p130cas, prevents phagocytosis)	536.59.con.0015	fig|536.59.peg.3018	1470	489
YscN,SpaL,MxiB,HrcN,EscN	Type III secretion cytoplasmic ATP synthase (EC 3.6.3.14, YscN,SpaL,MxiB,HrcN,EscN)	536.59.con.0006	fig|536.59.peg.1443	1290	429
YopK,YopQ	Type III secretion negative modulator of injection (YopK,YopQ,controls size of translocator pore)	536.59.con.0006	fig|536.59.peg.1453	1257	418
YopB	Type III secretion host injection protein (YopB)	536.59.con.0006	fig|536.59.peg.1454	1158	385
YopN,Yop4b,LcrE	Type III secretion outermembrane contact sensing protein (YopN,Yop4b,LcrE)	536.59.con.0006	fig|536.59.peg.1440	1122	373
YscU,SpaS,EscU,HrcU,SsaU	Type III secretion inner membrane protein (YscU,SpaS,EscU,HrcU,SsaU, homologous to flagellar export components)	536.59.con.0006	fig|536.59.peg.1450	1062	353
YopD	Type III secretion host injection and negative regulator protein (YopD)	536.59.con.0006	fig|536.59.peg.1445	1002	333
YscQ	Type III secretion inner membrane protein (YscQ,homologous to flagellar export components)	536.59.con.0006	fig|536.59.peg.1446	891	296
YscT,HrcT,SpaR,EscT,EpaR1	Type III secretion inner membrane protein (YscT,HrcT,SpaR,EscT,EpaR1,homologous to flagellar export components)	536.59.con.0006	fig|536.59.peg.1449	768	255
YscJ,HrcJ,EscJ, PscJ	Type III secretion bridge between inner and outermembrane lipoprotein (YscJ,HrcJ,EscJ, PscJ)	536.59.con.0008	fig|536.59.peg.1842	729	242
LcrF,VirF	Type III secretion thermoregulatory protein (LcrF,VirF,transcription regulation of virulence plasmid)	536.59.con.0006	fig|536.59.peg.1438	681	226
YscR,SpaR,HrcR,EscR	Type III secretion inner membrane protein (YscR,SpaR,HrcR,EscR,homologous to flagellar export components)	536.59.con.0006	fig|536.59.peg.1447	663	220
BsaR	Type III secretion system protein BsaR	536.59.con.0006	fig|536.59.peg.1442	408	135
YscS	Type III secretion inner membrane protein (YscS,homologous to flagellar export components)	536.59.con.0006	fig|536.59.peg.1448	261	86
YscF	Type III secretion cytoplasmic protein (YscF)	536.59.con.0008	fig|536.59.peg.1840	255	84
ORFs coding for putative haemolysin genes
Feature Type	Product	contig	PATRIC ID	Nucleotide length	AA Length
CDS	Putative hemolysin	536.59.con.0004	fig|536.59.peg.1105	258	85
CDS	Hemolysin	536.59.con.0004	fig|536.59.peg.1150	513	170
CDS	Putative hemolysin	536.59.con.0009	fig|536.59.peg.2228	750	249
CDS	Phospholipase/lecithinase/hemolysin	536.59.con.0012	fig|536.59.peg.2567	960	319
CDS	Phospholipase/lecithinase/hemolysin	536.59.con.0023	fig|536.59.peg.3924	1335	444
CDS	Phospholipase/lecithinase/hemolysin	536.59.con.0023	fig|536.59.peg.3926	1347	448
CDS	FIG01964566: Predicted membrane protein, hemolysin III homolog	536.59.con.0030	fig|536.59.peg.4432	618	205
